# Supplementary material for: Characterization and Genetic Analyses of New Genes Coding for NOD2 Interacting Proteins
Source: PubMed Central journal article supplement (PMC5094585; doi:10.1371/journal.pone.0165420), 2016-11-03

**S1 Fig: ANKHD1 is expressed in intestinal mucosa.** Immunofluorescence in intestinal mucosa using a purified rabbit polyclonal anti-peptide antibody recognizing ANKHD1. Fluorescence images (right) are shown in parallel with the Nomarski field (left). The white scale bar represents 10 $\mu$ m.

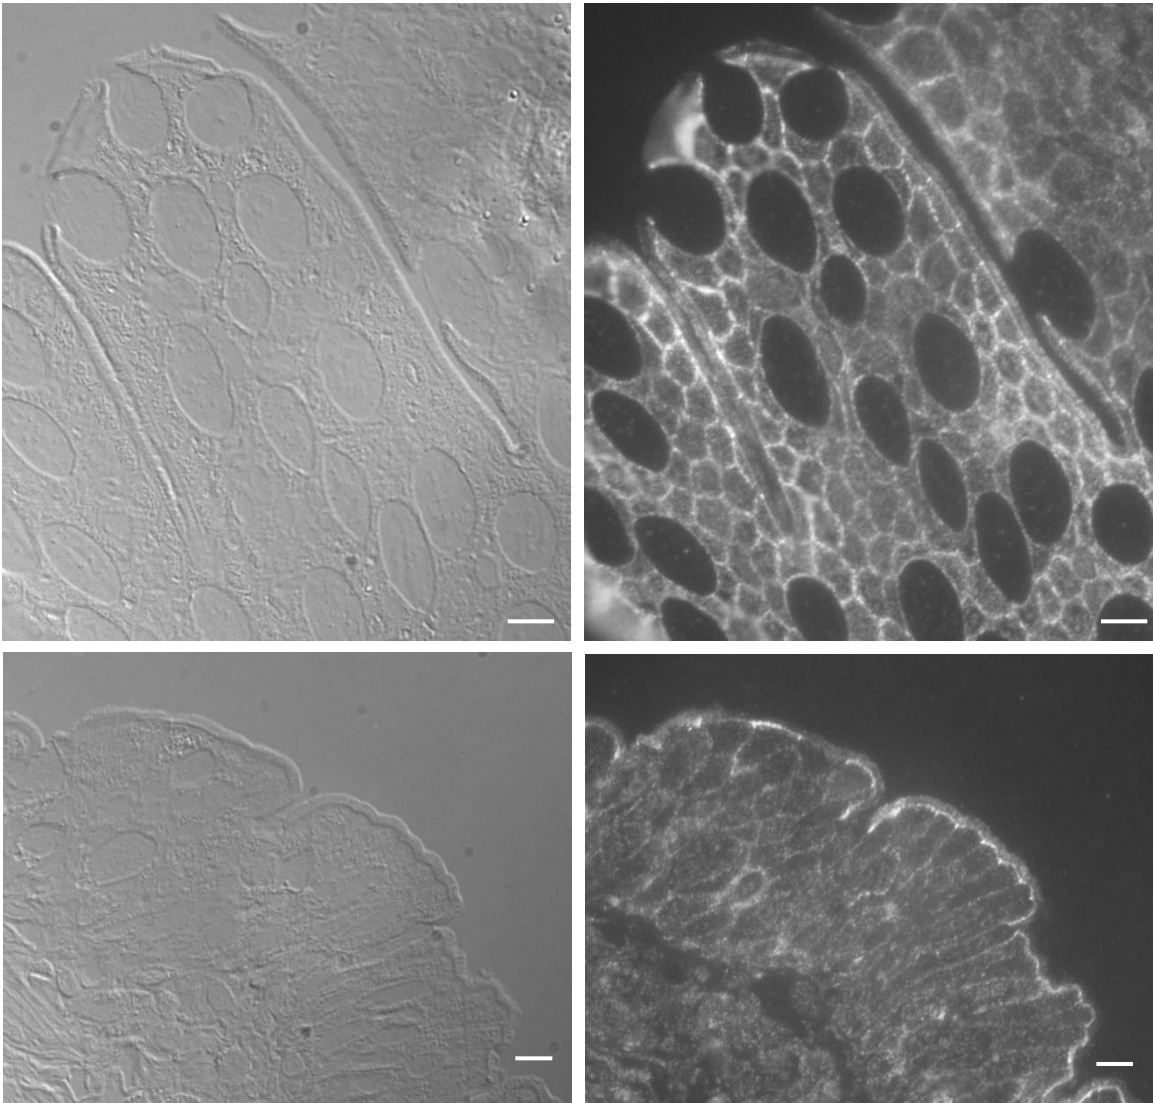

Supplement: pone.0165420.s001.pdf [file pone.0165420.s001.pdf]
