# Supplementary material for: Characterization and Genetic Analyses of New Genes Coding for NOD2 Interacting Proteins
Source: PubMed Central journal article supplement (PMC5094585; doi:10.1371/journal.pone.0165420), 2016-11-03
Supplement: pone.0165420.s002.pdf [file pone.0165420.s002.pdf]

**S1 Table: Detailed phenotype for 59 selected Y2H clones (17 NIP candidates) identified in the lung library:** Growing yeast colonies were tested and scored by 3 phenotypic assays (His+3-AT, Ura+,  $\beta$ -Gal).

| Gene ID                        | HIS | URA  | LACZ |
|--------------------------------|-----|------|------|
| <b>RICK</b>                    | 3+  | 2+   | 2+   |
|                                | 3+  | 3+   | 3+   |
|                                | 3+  | 1+   | 2+   |
|                                | 3+  | NEG  | 2+   |
| <b>DOCK7</b>                   | 3+  | NEG  | 3+   |
|                                | 3+  | 2+   | 2+   |
|                                | 3+  | NEG  | 3+   |
| <b>DCTN1</b>                   | 3+  | 1+/- | 3+   |
|                                | 3+  | 1+   | 3+   |
| <b>GOLGB1</b>                  | 2+  | 3+   | 3+   |
|                                | 3+  | 3+   | 3+   |
| <b>PRR16</b>                   | 2+  | 2+   | 3+   |
| <b>ANKHD1</b>                  | 3+  | 1+   | 3+   |
| <b>TRIM41</b>                  | 2+  | NEG  | 2+   |
|                                | 2+  | 1+   | 1+   |
|                                | 3+  | 1+/- | 2+   |
|                                | 2+  | 2+   | NEG  |
| <b>CHMP5</b>                   | 2+  | 1+/- | 2+   |
|                                | 2+  | 1+   | 1+   |
|                                | 3+  | NEG  | 2+   |
|                                | 2+  | 2+   | 2+   |
| <b>SDCCAG3</b>                 | 2+  | 2+   | NEG  |
|                                | 3+  | 2+   | 1+   |
|                                | 2+  | 2+   | NEG  |
| <b>C10ORF67/<br/>C10ORF115</b> | 3+  | 3+   | 3+   |
|                                | 3+  | 3+   | 3+   |
|                                | 3+  | 3+   | 3+   |
|                                | 3+  | 3+   | 3+   |
|                                | 3+  | 3+   | 3+   |
|                                | 3+  | 3+   | 3+   |
| <b>VIM</b>                     | 3+  | 2+   | 3+   |
| <b>IKBIP</b>                   | 3+  | 2+   | 3+   |
|                                | 3+  | 1+   | 2+   |
|                                | 3+  | 2+   | 3+   |
|                                | 3+  | 3+   | 3+   |
|                                | 3+  | 2+   | 3+   |
| <b>GOLGA6L5</b>                | 3+  | 3+   | 3+   |
|                                | 3+  | 3+   | 3+   |
|                                | 3+  | 3+   | 3+   |
|                                | 3+  | 3+   | 3+   |
|                                | 3+  | 3+   | 3+   |
|                                | 3+  | 2+   | 3+   |
|                                | 3+  | 2+   | 3+   |
|                                | 3+  | 3+   | 3+   |
|                                | 3+  | 3+   | 3+   |
|                                | 3+  | 3+   | 3+   |
| <b>KRT15</b>                   | 3+  | 1+   | 3+   |
|                                | 3+  | 1+   | 2+   |
|                                | 3+  | 1+   | 2+   |
|                                | 3+  | 1+   | 2+   |
| <b>PPP1R12C</b>                | 2+  | 2+   | 3+   |
|                                | 2+  | 2+   | 3+   |
|                                | 3+  | 3+   | 3+   |
|                                | 2+  | 2+   | 3+   |
| <b>LDOC1</b>                   | 3+  | NEG  | 3+   |
|                                | 3+  | NEG  | 3+   |
|                                | 3+  | NEG  | 3+   |
| <b>PPP2R3B</b>                 | 3+  | 1+   | 3+   |
