# Supplementary material for: Characterization and Genetic Analyses of New Genes Coding for NOD2 Interacting Proteins
Source: PubMed Central journal article supplement (PMC5094585; doi:10.1371/journal.pone.0165420), 2016-11-03
Supplement: pone.0165420.s003.pdf [file pone.0165420.s003.pdf]

**S2 Table: additional NOD2 Y2H preys fished out from colon library**

| <b>Y2H preys isolated with NOD2 bait</b>     | <b>Screen 1</b> | <b>Screen 2</b> | <b>Screen3</b> |
|----------------------------------------------|-----------------|-----------------|----------------|
| <b>CHMP4b</b>                                | <b>6</b>        | <b>7</b>        | <b>3</b>       |
| <b>PDLIM5Annexin A2</b>                      | <b>1</b>        | <b>-</b>        | <b>-</b>       |
| <b>TACC3</b>                                 | <b>1</b>        | <b>-</b>        | <b>-</b>       |
| <b>HAP1</b>                                  | <b>1</b>        | <b>-</b>        | <b>-</b>       |
| <b>Annexin A2</b>                            | <b>-</b>        | <b>1</b>        | <b>-</b>       |
| <b>C9ORF150</b>                              | <b>-</b>        | <b>1</b>        | <b>6</b>       |
| <b>SCYL1</b>                                 | <b>-</b>        | <b>1</b>        | <b>-</b>       |
| <b>Tropomyosin alpha</b>                     | <b>-</b>        | <b>1</b>        | <b>-</b>       |
| <b>NDKinase type 6</b>                       | <b>-</b>        | <b>1</b>        | <b>-</b>       |
| <b>RPL13A</b>                                | <b>-</b>        | <b>1</b>        | <b>-</b>       |
| <b>ALPI /Intestinal alkaline phosphatase</b> | <b>-</b>        | <b>1</b>        | <b>-</b>       |
| <b>VCP/valosin-containing protein</b>        | <b>-</b>        | <b>-</b>        | <b>2</b>       |
| <b>lamin A</b>                               | <b>-</b>        | <b>-</b>        | <b>2</b>       |
| <b>WBP11/ SNP70</b>                          | <b>-</b>        | <b>-</b>        | <b>2</b>       |
| <b>TNIP1</b>                                 | <b>-</b>        | <b>-</b>        | <b>1</b>       |
